1 **Antimicrobial susceptibility patterns of anaerobic bacteria in Victoria,**  
2 **Australia.**

3

4 Jasmine C. Teng,<sup>a##</sup>\* Linda Dreyer L<sup>a</sup>

5 <sup>a</sup>Department of Microbiology, Australian Clinical Labs, Clayton, Victoria, Australia.

6

7 Running head: Antimicrobial susceptibility of anaerobes

8

9 #Address correspondence to Jasmine C. Teng, [jasmincteng@gmail.com](mailto:jasmincteng@gmail.com)

10 \*Present address: Jasmine C. Teng, Department of Microbiology, Melbourne  
11 Pathology, Victoria, Australia.

12

13

14

15

16

17

18

19

20

21

22

23

24

25

26 **Abstract:**

27 Mortality associated with anaerobic infections approximates 20%. Resistance of  
28 anaerobic bacteria to commonly used antimicrobials has been increasingly reported.  
29 The aim of this study was to describe antimicrobial susceptibility patterns of  
30 anaerobic bacteria isolated from clinical samples using a gradient diffusion method,  
31 E test (bioMérieux), in Victoria, Australia. Metronidazole, meropenem and  
32 amoxicillin-clavulanate were found to be active against almost all isolates tested.  
33 Most Gram positive anaerobic cocci (GPAC), except *Peptostreptococcus anaerobius*  
34 (64.6% penicillin-susceptible), remained susceptible to penicillin. All *Clostridium*  
35 *perfringens* isolates tested were penicillin, metronidazole and meropenem  
36 susceptible. Of *B. fragilis* isolates tested, 5% and 0.83% were meropenem and  
37 metronidazole non-susceptible, respectively. Clindamycin susceptibility in anaerobes  
38 other than the GPAC is approximately 75% and therefore should not be used as  
39 empirical treatment in the absence of susceptibility testing. Considering the global  
40 trend of antibiotic resistance among anaerobic bacteria, routine susceptibility testing  
41 of anaerobic bacteria, particularly when isolated from critical sites, as well as  
42 surveillance of local resistance trends is strongly encouraged. Gradient diffusion MIC  
43 determination of anaerobic bacteria is feasible in a clinical diagnostic laboratory and  
44 should be more widely utilised.

45

46

47

48

49

50

## 51 **Introduction**

52 Anaerobic infections cause significant morbidity and mortality and various clinical  
53 studies have demonstrated adverse survival outcomes in patients due to  
54 inappropriate therapy. Furthermore, anaerobic resistance to commonly used  
55 antimicrobial agents has increasingly been reported.(1, 2)

56 Despite this, routine antimicrobial susceptibility testing of clinical anaerobic isolates  
57 remains a contentious issue.(3) This is in part due to difficulties associated with  
58 identification, purification and manipulation of anaerobes. In the past decade, the  
59 introduction of matrix-assisted light desorption ionization- time of flight (Maldi-TOF)  
60 mass spectrometry in most diagnostic microbiology laboratories has greatly  
61 enhanced the ability for microbial identification in a time and cost-efficient manner.

62 Multiple studies have corroborated the accuracy and reliability of anaerobic bacteria  
63 identification by MALDI-TOF.(4-7) At present, there is no ISO standard reference  
64 method for susceptibility testing of anaerobic bacteria. Procedural guidelines have  
65 been published by the Clinical and Laboratory Standards Institute (CLSI), (8)  
66 European Committee on Antimicrobial Susceptibility Testing (EUCAST),(9) and  
67 Calibration, Dichotomous Susceptibility (CDS).(10) CLSI recommends minimum  
68 inhibitory concentration (MIC) determination by broth microdilution for *Bacteroides*  
69 *fragilis* group and agar dilution for all anaerobes,(8) whereas the EUCAST  
70 recommends testing with an MIC method, and reference to the manufacturer's  
71 instructions of a commercial product.(9) Clinical MIC breakpoints for main classes of  
72 anaerobic antimicrobials are provided by each committee respectively; these differ  
73 and should be interpreted with care. The CDS recommends disc susceptibility testing  
74 method for anaerobes with interpretive annular radius cutoffs.(10)

75 Both broth microdilution and agar dilution methods for anaerobes are time-  
76 consuming, require expertise and are not practical to be implemented in a routine  
77 diagnostic laboratory. In the past, susceptibility testing by disc diffusion has not  
78 been recommended due to suboptimal correlation and reproducibility.(11) A recent  
79 correlation study by Nagy et al, demonstrated good agreement between zone  
80 diameter and MIC for *Bacteroides fragilis* group of bacteria using EUCAST rules and  
81 breakpoints,(12) although further validation is needed. MIC determination by gradient  
82 diffusion has shown reasonable correlation with broth microdilution and agar dilution  
83 methods.(13-17) Gradient diffusion MIC is easy to perform and readily implemented  
84 using commercially available products, E test (bioMérieux) and MIC Evaluator  
85 (M.I.C.E., Thermo Fisher Scientific) strips.

86 In Australia, antimicrobial susceptibility testing of anaerobes is done sporadically and  
87 treatment of anaerobic infections is largely empirical. As such, antimicrobial  
88 susceptibility trends of anaerobic bacteria over time is largely unknown.

89 The aim of this study was to describe the antimicrobial susceptibility patterns of  
90 anaerobic bacteria from clinical samples in a private clinical microbiology laboratory  
91 in Victoria, Australia.

92

### 93 **Materials and methods:**

#### 94 **Isolates:**

95 Anaerobic bacteria isolated from clinical specimens were collected from January  
96 2015 to January 2018 from both community and hospital samples from Victoria.  
97 Clinical sources included blood culture, swabs of skin/superficial sites, deep  
98 sites/abscesses, wounds (not otherwise specified) and genital swabs. Pure  
99 anaerobic bacterial isolates were obtained from blood culture and sterile sites; the

100 presence of anaerobes from polymicrobial or non-sterile sites is indicated by a zone  
101 of inhibition around a metronidazole (5µg) disc as per laboratory protocol. Using the  
102 Bruker matrix-assisted laser desorption/ionization-time of flight (MALDI-TOFMS)  
103 instrument, anaerobic bacteria were identified to species and genus level based on  
104  $\log(\text{score}) \geq 2.0$  and  $\log(\text{score}) 1.7-2.0$ , respectively.

#### 105 **Susceptibility testing:**

106 *Gradient diffusion MIC determination.* A 1 MacFarland standard suspension of a  
107 48hr growth culture was made and inoculated with a swab onto Brucella Agar  
108 supplemented with blood (5%), 5mg/L haemin and 1mg/L vitamin K (Oxoid PP2459).  
109 E-test strips (bioMérieux) were then applied and the plates incubated at 35°C, under  
110 anaerobic conditions using an atmosphere generation system (AnaeroGen, Oxoid,  
111 AN0035A). *Bacteroides fragilis* ATCC25285 was tested against each new lot number  
112 of Etest strips as quality control, as per the manufacturer's instructions. Controls for  
113 anaerobiasis included organism controls, *Bacteroides fragilis* ATCC25285 and  
114 *Pseudomonas aeruginosa* ATCC25668, and a chemical resazurin redox indicator  
115 (Anaerobic Indicator, Oxoid, BR0055B). Each isolate was tested against the  
116 antibiotics benzylpenicillin, amoxicillin-clavulanate, clindamycin, metronidazole and  
117 meropenem. MIC was read at 100% growth inhibition after 24 and 48hours of  
118 incubation. Results obtained at 48hours were considered final. The MIC values were  
119 interpreted according to both the CLSI(8) and EUCAST(9) clinical breakpoints. The  
120 amoxicillin-clavulanate E test strips contained amoxicillin and clavulanic acid in a  
121 2:1 ratio, therefore only CLSI breakpoints were applied for interpretation. Slower  
122 growing anaerobic bacteria and those which could not be identified reliably by Maldi-  
123 TOF MS were excluded from this study.

#### 124 **Results/Discussion**

125 Four hundred and sixteen anaerobic isolates were collected during the study period.  
126 Clinical sources for these bacteria included blood culture(n=68), swabs of skin and  
127 superficial sites(n=77), deep collection/abscesses (n=37), wounds (not otherwise  
128 specified) (n=216), and genital swabs(n=19). The anaerobic bacteria collected and  
129 tested are shown in Table 1. *Bacteroides fragilis* (n=120) and *Peptostreptococcus*  
130 *anaerobius* (n=79) were the most commonly isolated anaerobes. The MIC range,  
131 MIC<sub>50</sub>, MIC<sub>90</sub> and percentage susceptibility according to CLSI and EUCAST  
132 breakpoints for the Gram negative and Gram positive anaerobes are shown in  
133 Tables 2.

134 Consistent with known data, all isolates in the *Bacteroides fragilis* group and most  
135 *Prevotella* isolates (83.7%) were penicillin non-susceptible. 99.1% and 94% *B.*  
136 *fragilis* isolates were susceptible to metronidazole and meropenem, respectively.  
137 Most Gram positive anaerobic cocci (GPAC), except *Peptostreptococcus anaerobius*  
138 (64.6% penicillin-susceptible), remained susceptible to penicillin. 100%  
139 *Propionebacterium* sp. tested (n=17) were metronidazole-resistant and susceptible  
140 to penicillin and clindamycin. All *Clostridium perfringens* isolates tested were  
141 penicillin, metronidazole and meropenem susceptible. Clindamycin susceptibility  
142 varied across all groups of anaerobic bacteria. When both CLSI and EUCAST MIC  
143 breakpoints were applied, the overall categorical agreement for penicillin,  
144 clindamycin, metronidazole and meropenem were 97.6%, 92.3%,99.0% and 98.3%,  
145 respectively.

146 Anaerobic bacteria form part of the normal human indigenous microflora.(18)  
147 Research into the remarkable diversity of the human microbiome, including  
148 anaerobic bacteria in health and disease states has flourished in recent years, with  
149 particular emphasis on gut microbiome.(18, 19) Anaerobic bacteria are also

150 opportunistic pathogens, causing bacteraemia and sepsis(20), necrotizing skin  
151 infections,(21) and rarely endocarditis.(22) The mortality rate associated with  
152 anaerobic bacteraemia has been reported to be 1-19%.(20, 23) Publications on  
153 antimicrobial resistance trends among anaerobic bacteria in North America(24, 25),  
154 Europe(2, 26, 27), and Australasia(28, 29) are prolific. Overall there has been  
155 increase in *cfiA* gene encoded chromosomal zinc metallo- $\beta$ -lactamase enzyme  
156 mediated carbapenem resistance and resistance to clindamycin and metronidazole.  
157 According to our study, metronidazole, meropenem and amoxicillin-clavulanate  
158 were found to be active against almost all isolates tested, making them ideal agents  
159 for empirical therapy. Of the 120 *B. fragilis* isolates tested, 6 (5%) and 1 (0.83%)  
160 were meropenem and metronidazole non-susceptible, respectively. Clindamycin  
161 susceptibility in anaerobes other than the GPAC was approximately 75% and  
162 therefore should not be used as empirical treatment in the absence of susceptibility  
163 testing. Of note, 100% of *Propionebacterium* spp. was found to be metronidazole-  
164 resistant; this resistance profile may reliably be used as a supplementary for  
165 organism identification; conversely, in cases of *Propionebacterium* spp. post-  
166 operative shoulder joint or central nervous system shunt infections, metronidazole  
167 should not be used as a therapeutic agent.

168 The use of a metronidazole (5 $\mu$ g) disc for screening and detection of anaerobes in  
169 polymicrobial and non-sterile samples has been part of laboratory practice for  
170 decades. While this method is cheap and simple, it biases towards isolation of  
171 susceptible strains and will inherently miss metronidazole resistant strains. Thus, the  
172 proportion of metronidazole-resistant anaerobic bacterial isolates from non-sterile  
173 sites in this study is likely underestimated.

174 Gradient diffusion MIC determination using commercially available products E tests  
175 (bioMérieux) and MIC Evaluator (M.I.C.E., Thermo Fisher Scientific) strips are easy  
176 to setup and use without the need of specialized equipment. According to our  
177 experience, MIC determination of the commonly encountered anaerobes at 100%  
178 growth inhibition read at 48 hours was straightforward, with minimal interobserver  
179 variability. Therefore, this method is uniquely placed for susceptibility testing of  
180 anaerobic bacteria in routine clinical microbiology practice, and should be more  
181 commonly utilized. In this study, carbapenem and metronidazole resistant isolates by  
182 E test was not confirmed with agar dilution or molecular detection of resistance  
183 genes.

184 This study provides MIC data on the current local resistance patterns of commonly  
185 encountered anaerobes in Australia by gradient diffusion. Considering the global  
186 trend of antibiotic resistance among aerobic bacteria, routine susceptibility testing of  
187 anaerobic bacteria, particularly isolates from critical sites, as well as surveillance of  
188 local resistance trends is strongly encouraged.

189 **Acknowledgements:**

190 Contribution statement: LD and JT jointly conceived the study idea and design. JT  
191 performed susceptibility testing on all isolates. JT and LD contributed to data  
192 analysis, manuscript writing and review of manuscript. The authors would like to  
193 acknowledge all microbiology scientists at Australian Clinical Labs for assistance in  
194 collection of isolates.

195 **Funding:** This research did not receive any specific grant from funding agencies in  
196 the public, commercial, or not-for-profit sectors.

197

198



199 **References**

- 200 1. **Hastey CJ, Boyd H, Schuetz AN, Anderson K, Citron DM, Dzink-Fox J,**  
201 **Hackel M, Hecht DW, Jacobus NV, Jenkins SG, Karlsson M, Knapp CC,**  
202 **Koeth LM, Wexler H, Roe-Carpenter DE, From the Ad Hoc Working**  
203 **Group on Antimicrobial Susceptibility Testing of Anaerobic Bacteria of**  
204 **C.** 2016. Changes in the antibiotic susceptibility of anaerobic bacteria from  
205 2007-2009 to 2010-2012 based on the CLSI methodology. *Anaerobe*  
206 doi:10.1016/j.anaerobe.2016.07.003.
- 207 2. **Boyanova L, Kolarov R, Mitov I.** 2015. Recent evolution of antibiotic  
208 resistance in the anaerobes as compared to previous decades. *Anaerobe*  
209 **31:4-10.**
- 210 3. **Nagy E, Schuetz A.** 2015. Is there a need for the antibiotic susceptibility  
211 testing of anaerobic bacteria? *Anaerobe* **31:2-3.**
- 212 4. **Veloo AC, Welling GW, Degener JE.** 2011. The identification of anaerobic  
213 bacteria using MALDI-TOF MS. *Anaerobe* **17:211-212.**
- 214 5. **Justesen US, Holm A, Knudsen E, Andersen LB, Jensen TG, Kemp M,**  
215 **Skov MN, Gahrn-Hansen B, Moller JK.** 2011. Species identification of  
216 clinical isolates of anaerobic bacteria: a comparison of two matrix-assisted  
217 laser desorption ionization-time of flight mass spectrometry systems. *J Clin*  
218 *Microbiol* **49:4314-4318.**
- 219 6. **Barba MJ, Fernandez A, Oviano M, Fernandez B, Velasco D, Bou G.**  
220 2014. Evaluation of MALDI-TOF mass spectrometry for identification of  
221 anaerobic bacteria. *Anaerobe* **30:126-128.**

- 222 7. **Hsu YM, Burnham CA.** 2014. MALDI-TOF MS identification of anaerobic  
223 bacteria: assessment of pre-analytical variables and specimen preparation  
224 techniques. *Diagn Microbiol Infect Dis* **79**:144-148.
- 225 8. **Anonymous.** 2012. Clinical Laboratory Standards Institute, Methods for  
226 Antimicrobial Susceptibility Testing of Anaerobic Bacteria. Approved Standard  
227 CLSI Publication Number M11-a8.
- 228 9. **Anonymous.** 2017. The European Committee on Antimicrobial Susceptibility  
229 Testing, Breakpoint Tables for Interpretation of MICs and Zone Diameters.  
230 Version 7, 2017.
- 231 10. **Anonymous.** 2016. Antibiotic Susceptibility Testing By The CDS Method. A  
232 Manual For Medical And Veterinary Laboratories. Eighth Edition.
- 233 11. **Schuetz AN.** 2014. Antimicrobial resistance and susceptibility testing of  
234 anaerobic bacteria. *Clin Infect Dis* **59**:698-705.
- 235 12. **Nagy E, Justesen US, Eitel Z, Urban E, Infection ESGoA.** 2015.  
236 Development of EUCAST disk diffusion method for susceptibility testing of the  
237 *Bacteroides fragilis* group isolates. *Anaerobe* **31**:65-71.
- 238 13. **Rennie RP, Turnbull L, Brosnikoff C, Cloke J.** 2012. First comprehensive  
239 evaluation of the M.I.C. evaluator device compared to Etest and CLSI  
240 reference dilution methods for antimicrobial susceptibility testing of clinical  
241 strains of anaerobes and other fastidious bacterial species. *J Clin Microbiol*  
242 **50**:1153-1157.
- 243 14. **Rosenblatt JE, Gustafson DR.** 1995. Evaluation of the Etest for  
244 susceptibility testing of anaerobic bacteria. *Diagn Microbiol Infect Dis* **22**:279-  
245 284.

- 246 15. **Croco JL, Erwin ME, Jennings JM, Putnam LR, Jones RN.** 1995.  
247 Evaluation of the Etest for determinations of antimicrobial spectrum and  
248 potency against anaerobes associated with bacterial vaginosis and peritonitis.  
249 Clin Infect Dis **20 Suppl 2**:S339-341.
- 250 16. **Citron DM, Ostovari MI, Karlsson A, Goldstein EJ.** 1991. Evaluation of the  
251 E test for susceptibility testing of anaerobic bacteria. J Clin Microbiol **29**:2197-  
252 2203.
- 253 17. **Wust J, Hardegger U.** 1992. Comparison of the E test and a reference agar  
254 dilution method for susceptibility testing of anaerobic bacteria. Eur J Clin  
255 Microbiol Infect Dis **11**:1169-1173.
- 256 18. **Hentges DJ.** 1993. The anaerobic microflora of the human body. Clin Infect  
257 Dis **16 Suppl 4**:S175-180.
- 258 19. **Lloyd-Price J, Abu-Ali G, Huttenhower C.** 2016. The healthy human  
259 microbiome. Genome Med **8**:51.
- 260 20. **Brook I.** 2010. The role of anaerobic bacteria in bacteremia. Anaerobe  
261 **16**:183-189.
- 262 21. **Zhao-Fleming H, Dissanaik S, Rumbaugh K.** 2017. Are anaerobes a  
263 major, underappreciated cause of necrotizing infections? Anaerobe **45**:65-70.
- 264 22. **Kestler M, Munoz P, Marin M, Goenaga MA, Idigoras Viedma P, de**  
265 **Alarcon A, Lepe JA, Sousa Regueiro D, Bravo-Ferrer JM, Pajaron M,**  
266 **Costas C, Garcia-Lopez MV, Hidalgo-Tenorio C, Moreno M, Bouza E,**  
267 **Spanish Collaboration on E.** 2017. Endocarditis caused by anaerobic  
268 bacteria. Anaerobe **47**:33-38.
- 269 23. **Goldstein EJ.** 1996. Anaerobic bacteremia. Clin Infect Dis **23 Suppl 1**:S97-  
270 101.

- 271 24. **Snydman DR, Jacobus NV, McDermott LA, Golan Y, Goldstein EJ,**  
272 **Harrell L, Jenkins S, Newton D, Pierson C, Rosenblatt J, Venezia R,**  
273 **Gorbach SL, Queenan AM, Hecht DW.** 2011. Update on resistance of  
274 *Bacteroides fragilis* group and related species with special attention to  
275 carbapenems 2006-2009. *Anaerobe* **17**:147-151.
- 276 25. **Snydman DR, Jacobus NV, McDermott LA, Goldstein EJ, Harrell L,**  
277 **Jenkins SG, Newton D, Patel R, Hecht DW.** 2017. Trends in antimicrobial  
278 resistance among *Bacteroides* species and *Parabacteroides* species in the  
279 United States from 2010-2012 with comparison to 2008-2009. *Anaerobe*  
280 **43**:21-26.
- 281 26. **Ferlov-Schwensen SA, Sydenham TV, Hansen KCM, Hoegh SV, Justesen**  
282 **US.** 2017. Prevalence of antimicrobial resistance and the *cfiA* resistance gene  
283 in Danish *Bacteroides fragilis* group isolates since 1973. *Int J Antimicrob*  
284 *Agents* **50**:552-556.
- 285 27. **Wybo I, Van den Bossche D, Soetens O, Vekens E, Vandoorslaer K,**  
286 **Claeys G, Glupczynski Y, Ieven M, Melin P, Nonhoff C, Rodriguez-**  
287 **Villalobos H, Verhaegen J, Pierard D.** 2014. Fourth Belgian multicentre  
288 survey of antibiotic susceptibility of anaerobic bacteria. *J Antimicrob*  
289 *Chemother* **69**:155-161.
- 290 28. **Roberts SA, Shore KP, Paviour SD, Holland D, Morris AJ.** 2006.  
291 Antimicrobial susceptibility of anaerobic bacteria in New Zealand: 1999-2003.  
292 *J Antimicrob Chemother* **57**:992-998.
- 293 29. **Chen SC, Gottlieb T, Palmer JM, Morris G, Gilbert GL.** 1992. Antimicrobial  
294 susceptibility of anaerobic bacteria in Australia. *J Antimicrob Chemother*  
295 **30**:811-820.

296

297

298

299

300

301

302

303

304

305

306

307

308

309

310

311

312

313

314

315

316

317

318

1 Table 1: List of anaerobic bacteria isolated between January 2015-January 2018

| <b><u>Anaerobic bacteria</u></b> | <b><u>No. of isolates</u></b> |
|----------------------------------|-------------------------------|
| <i>Actinomyces spp.</i>          |                               |
| <i>A.europeus</i>                | 2                             |
| <i>A.turiciensis</i>             | 1                             |
| <i>Anaerococcus spp.</i>         |                               |
| <i>A.hydrogenalis</i>            | 6                             |
| <i>A.murdochii</i>               | 2                             |
| <i>A.octavius</i>                | 1                             |
| <i>A.vaginalis</i>               | 10                            |
| <i>Bacteroides spp.</i>          |                               |
| <i>B. caccae</i>                 | 3                             |
| <i>B. cellulosilyticus</i>       | 1                             |
| <i>B. faecis</i>                 | 3                             |
| <i>B. fragilis</i>               | 83                            |
| <i>B. ovatus</i>                 | 7                             |
| <i>B. pyogenes</i>               | 6                             |
| <i>B. stercoris</i>              | 2                             |
| <i>B. thetaiotaomicron</i>       | 16                            |
| <i>B. uniformis</i>              | 3                             |
| <i>B. vulgatus</i>               | 5                             |
| <i>Bifidobacterium dentium</i>   | 1                             |
| <i>Clostridium spp.</i>          |                               |
| <i>C. paraputrificum</i>         | 2                             |
| <i>C. perfringens</i>            | 30                            |

|                                       |     |
|---------------------------------------|-----|
| <i>C. ramosum</i>                     | 2   |
| <i>C. septicum</i>                    | 4   |
| <i>C. sporogenes</i>                  | 3   |
| <i>C. tertium</i>                     | 2   |
| <i>Disulfovibrio desulfuricans</i>    | 1   |
| <i>Eggerthia catenaformis</i>         | 1   |
| <i>Finegoldia magna</i>               | 47  |
| <i>Murdochiella asaccharolytica</i>   | 1   |
| <i>Odoribacter splanchnicus</i>       | 1   |
| <i>Parvimonas micra</i>               | 2   |
| <i>Peptoniphilus harei</i>            | 38  |
| <i>Peptostreptococcus anaerobius</i>  | 79  |
| <i>Prevotella sp</i>                  |     |
| <i>P. bivia</i>                       | 24  |
| <i>P. buccae</i>                      | 1   |
| <i>P. disiens</i>                     | 4   |
| <i>P. nanceiensis</i>                 | 1   |
| <i>P. timonensis</i>                  | 1   |
| <i>Propionebacterium spp.</i>         | 17  |
| <i>Ruminococcus gnavus</i>            | 1   |
| <i>Staphylococcus saccharolyticus</i> | 2   |
| Total                                 | 416 |

3

4



**Table 2: Susceptibility patterns of anaerobic Gram-negative isolates to penicillin, clindamycin, metronidazole and meropenem.**

| Isolate (N tested) and antimicrobial agent                 | MIC( $\mu\text{g/mL}$ ) |                   |                   | CLSI ( $\mu\text{g/mL}$ ) |             |                      |       | EUCAST ( $\mu\text{g/mL}$ ) |         |                      |       |
|------------------------------------------------------------|-------------------------|-------------------|-------------------|---------------------------|-------------|----------------------|-------|-----------------------------|---------|----------------------|-------|
|                                                            |                         |                   |                   | Clinical breakpoint       |             | Susceptibility (%)** |       | Clinical breakpoint         |         | Susceptibility (%)** |       |
|                                                            | Range                   | MIC <sub>50</sub> | MIC <sub>90</sub> | S                         | R           | S                    | R     | S                           | R       | S                    | R     |
|                                                            |                         |                   |                   |                           |             |                      |       |                             |         |                      |       |
| <u><i>Bacteroides fragilis</i> group<sup>1</sup> (120)</u> |                         |                   |                   |                           |             |                      |       |                             |         |                      |       |
| penicillin                                                 | 0.38->256               | >256              | >256              | $\leq 0.5$                | $\geq 2$    | 0.83                 | 98.33 | $\leq 0.25$                 | $> 0.5$ | 0                    | 99.17 |
| amoxicillin/clavulanate*                                   | 0.125-32                | 0.5               | 4                 | $\leq 4/2$                | $\geq 16/8$ | 92.5                 | 0.83  | $\leq 4$                    | $> 8$   | -                    | -     |
| clindamycin                                                | <0.016->256             | 2                 | >256              | $\leq 2$                  | $\geq 8$    | 60.83                | 20.83 | $\leq 4$                    | $> 4$   | 76.67                | 23.33 |
| metronidazole                                              | 0.047-16                | 0.5               | 1                 | $\leq 8$                  | $\geq 32$   | 99.17                | 0     | $\leq 4$                    | $> 4$   | 99.17                | 0.83  |
| meropenem                                                  | 0.0125->32              | 0.094             | 0.5               | $\leq 4$                  | $\geq 16$   | 94.16                | 4.17  | $\leq 2$                    | $> 8$   | 93.33                | 5.83  |
| <u><i>Peptostreptococcus anaerobius</i> (79)</u>           |                         |                   |                   |                           |             |                      |       |                             |         |                      |       |
| penicillin                                                 | 0.023-16                | 0.094             | 12                | $\leq 0.5$                | $\geq 2$    | 64.56                | 35.44 | $\leq 0.25$                 | $> 0.5$ | 64.56                | 35.44 |
| amoxicillin/clavulanate*                                   | 0.032->256              | 0.25              | 128               | $\leq 4/2$                | $\geq 16/8$ | 67.09                | 30.38 | $\leq 4$                    | $> 8$   | -                    | -     |
| clindamycin                                                | 0.016-16                | 0.38              | 1                 | $\leq 2$                  | $\geq 8$    | 98.73                | 1.27  | $\leq 4$                    | $> 4$   | 98.73                | 1.27  |
| metronidazole                                              | <0.016-0.5              | 0.19              | 0.38              | $\leq 8$                  | $\geq 32$   | 100                  | 0     | $\leq 4$                    | $> 4$   | 100                  | 0     |
| meropenem                                                  | 0.003-6                 | 0.125             | 2                 | $\leq 4$                  | $\geq 16$   | 98.73                | 0     | $\leq 2$                    | $> 8$   | 93.67                | 0     |

*Finnegoldia magna* (47)

|                          |             |       |       |      |       |       |      |       |      |       |      |
|--------------------------|-------------|-------|-------|------|-------|-------|------|-------|------|-------|------|
| penicillin               | 0.016-0.019 | 0.047 | 0.094 | ≤0.5 | ≥2    | 100   | 0    | ≤0.25 | >0.5 | 100   | 0    |
| amoxicillin/clavulanate* | 0.047-0.25  | 0.125 | 0.19  | ≤4/2 | ≥16/8 | 100   | 0    | ≤4    | >8   | -     | -    |
| clindamycin              | 0.016->256  | 0.5   | 3     | ≤2   | ≥8    | 85.11 | 6.38 | ≤4    | >4   | 93.62 | 6.38 |
| metronidazole            | 0.032-1.5   | 0.19  | 0.5   | ≤8   | ≥32   | 100   | 0    | ≤4    | >4   | 100   | 0    |
| meropenem                | 0.003-0.19  | 0.023 | 0.047 | ≤4   | ≥16   | 100   | 0    | ≤2    | >8   | 100   | 0    |

*Peptoniphilus harei* (38)

|                          |            |        |       |      |       |       |      |       |      |       |      |
|--------------------------|------------|--------|-------|------|-------|-------|------|-------|------|-------|------|
| penicillin               | <0.016-0.5 | 0.032  | 0.047 | ≤0.5 | ≥2    | 100   | 0    | ≤0.25 | >0.5 | 97.37 | 0    |
|                          | <0.016-    |        |       |      |       |       |      |       |      |       |      |
| amoxicillin/clavulanate* | 0.064      | 0.016  | 0.047 | ≤4/2 | ≥16/8 | 100   | 0    | ≤4    | >8   | -     | -    |
|                          | <0.016-    |        |       |      |       |       |      |       |      |       |      |
| clindamycin              | >256       | 0.094  | 0.75  | ≤2   | ≥8    | 97.37 | 2.63 | ≤4    | >4   | 97.37 | 2.63 |
| metronidazole            | 0.016-3    | 0.5    | 1     | ≤8   | ≥32   | 100   | 0    | ≤4    | >4   | 100   | 0    |
|                          | <0.002-    |        |       |      |       |       |      |       |      |       |      |
| meropenem                | 0.003      | <0.002 | 0.002 | ≤4   | ≥16   | 100   | 0    | ≤2    | >8   | 100   | 0    |

*Prevotella* spp.<sup>2</sup> (31)

|            |          |   |    |      |    |       |       |       |      |       |       |
|------------|----------|---|----|------|----|-------|-------|-------|------|-------|-------|
| penicillin | 0.032-32 | 6 | 16 | ≤0.5 | ≥2 | 16.13 | 77.42 | ≤0.25 | >0.5 | 16.13 | 83.87 |
|------------|----------|---|----|------|----|-------|-------|-------|------|-------|-------|

|                                            |             |       |       |      |       |       |       |       |      |       |       |
|--------------------------------------------|-------------|-------|-------|------|-------|-------|-------|-------|------|-------|-------|
| amoxicillin/clavulanate*                   | 0.032-64    | 1     | 2     | ≤4/2 | ≥16/8 | 96.77 | 3.23  | ≤4    | >8   | -     | -     |
|                                            | <0.016-     |       |       |      |       |       |       |       |      |       |       |
| clindamycin                                | >256        | 0.032 | >256  | ≤2   | ≥8    | 74.19 | 25.81 | ≤4    | >4   | 74.19 | 25.81 |
| metronidazole                              | 0.38-12     | 1     | 2     | ≤8   | ≥32   | 93.55 | 0     | ≤4    | >4   | 90.32 | 9.68  |
| meropenem                                  | 0.012-1     | 0.064 | 0.094 | ≤4   | ≥16   | 100   | 0     | ≤2    | >8   | 100   | 0     |
| <u><i>Clostridium perfringens</i> (30)</u> |             |       |       |      |       |       |       |       |      |       |       |
| penicillin                                 | 0.032-0.25  | 0.064 | 0.125 | ≤0.5 | ≥2    | 100   | 0     | ≤0.25 | >0.5 | 100   | 0     |
| amoxicillin/clavulanate*                   | <0.016-0.25 | 0.047 | 0.125 | ≤4/2 | ≥16/8 | 100   | 0     | ≤4    | >8   | -     | -     |
| clindamycin                                | 0.064->256  | 1     | 4     | ≤2   | ≥8    | 76.67 | 3.33  | ≤4    | >4   | 96.67 | 3.33  |
| metronidazole                              | 0.5-3.0     | 1.5   | 2     | ≤8   | ≥32   | 100   | 0     | ≤4    | >4   | 100   | 0     |
|                                            | <0.002-     |       |       |      |       |       |       |       |      |       |       |
| meropenem                                  | 0.094       | 0.006 | 0.012 | ≤4   | ≥16   | 100   | 0     | ≤2    | >8   | 100   | 0     |
| <u><i>Anaerococcus</i> spp(19)</u>         |             |       |       |      |       |       |       |       |      |       |       |
| penicillin                                 | <0.016-0.5  | 0.023 | 0.19  | ≤0.5 | ≥2    | 100   | 0     | ≤0.25 | >0.5 | 94.74 | 0     |
| amoxicillin/clavulanate*                   | <0.016-0.38 | 0.016 | 0.094 | ≤4/2 | ≥16/8 | 100   | 0     | ≤4    | >8   | -     | -     |
|                                            | <0.016-     |       |       |      |       |       |       |       |      |       |       |
| clindamycin                                | >256        | 0.023 | 2     | ≤2   | ≥8    | 89.47 | 10.53 | ≤4    | >4   | 89.47 | 10.53 |

|                                                               |             |       |       |      |       |       |       |       |      |       |       |
|---------------------------------------------------------------|-------------|-------|-------|------|-------|-------|-------|-------|------|-------|-------|
| metronidazole                                                 | <0.016-0.75 | 0.047 | 0.75  | ≤8   | ≥32   | 100   | 0     | ≤4    | >4   | 100   | 0     |
|                                                               | <0.002-     |       |       |      |       |       |       |       |      |       |       |
| meropenem                                                     | 0.064       | 0.006 | 0.047 | ≤4   | ≥16   | 100   | 0     | ≤2    | >8   | 100   | 0     |
| <u>Propionebacterium spp.(17)</u>                             |             |       |       |      |       |       |       |       |      |       |       |
| penicillin                                                    | <0.016-0.64 | 0.016 | 0.023 | ≤0.5 | ≥2    | 100   | 0     | ≤0.25 | >0.5 | 100   | 0     |
| amoxicillin/clavulanate*                                      | <0.016-0.19 | 0.032 | 0.094 | ≤4/2 | ≥16/8 | 100   | 0     | ≤4    | >8   | -     | -     |
| clindamycin                                                   | 0.016-0.094 | 0.032 | 0.064 | ≤2   | ≥8    | 100   | 0     | ≤4    | >4   | 100   | 0     |
| metronidazole                                                 | 64->256     | >256  | >256  | ≤8   | ≥32   | 0     | 100   | ≤4    | >4   | 0     | 100   |
| meropenem                                                     | 0.006-0.064 | 0.012 | 0.047 | ≤4   | ≥16   | 100   | 0     | ≤2    | >8   | 100   | 0     |
| <u>Other Clostridium spp.<sup>3</sup> (13)</u>                |             |       |       |      |       |       |       |       |      |       |       |
| penicillin                                                    | 0.016-2     | 0.064 | 1     | ≤0.5 | ≥2    | 76.92 | 7.69  | ≤0.25 | >0.5 | 76.93 | 23.07 |
| amoxicillin/clavulanate*                                      | 0.016-1     | 0.125 | 0.5   | ≤4/2 | ≥16/8 | 100   | 0     | ≤4    | >8   | -     | -     |
| clindamycin                                                   | 0.064-64    | 2     | 32    | ≤2   | ≥8    | 53.85 | 46.15 | ≤4    | >4   | 53.85 | 46.15 |
| metronidazole                                                 | 0.032-16    | 1     | 4     | ≤8   | ≥32   | 92.31 | 0     | ≤4    | >4   | 92.31 | 7.69  |
| meropenem                                                     | 0.012-0.38  | 0.094 | 0.38  | ≤4   | ≥16   | 100   | 0     | ≤2    | >8   | 100   | 0     |
| <u>Other Gram negative anaerobic bacteria<sup>4</sup>(11)</u> |             |       |       |      |       |       |       |       |      |       |       |
| penicillin                                                    | <0.016-     | 1     | >256  | ≤0.5 | ≥2    | 38.46 | 46.15 | ≤0.25 | >0.5 | 38.46 | 61.54 |

|                                                               |             |       |       |      |       |       |       |       |      |       |       |
|---------------------------------------------------------------|-------------|-------|-------|------|-------|-------|-------|-------|------|-------|-------|
|                                                               | >256        |       |       |      |       |       |       |       |      |       |       |
| amoxicillin/clavulanate*                                      | <0.016-4    | 0.125 | 0.75  | ≤4/2 | ≥16/8 | 100   | 0     | ≤4    | >8   | -     | -     |
|                                                               | <0.016-     |       |       |      |       |       |       |       |      |       |       |
| clindamycin                                                   | >256        | 0.016 | 2     | ≤2   | ≥8    | 92.31 | 7.69  | ≤4    | >4   | 92.31 | 7.69  |
| metronidazole                                                 | <0.016-1    | 0.094 | 0.75  | ≤8   | ≥32   | 100   | 0     | ≤4    | >4   | 100   | 0     |
| meropenem                                                     | <0.002-0.19 | 0.016 | 0.19  | ≤4   | ≥16   | 100   | 0     | ≤2    | >8   | 100   | 0     |
| <u>Other Gram positive anaerobic bacteria<sup>5</sup>(11)</u> |             |       |       |      |       |       |       |       |      |       |       |
|                                                               | <0.016-     |       |       |      |       |       |       |       |      |       |       |
| penicillin                                                    | 0.094       | 0.016 | 0.064 | ≤0.5 | ≥2    | 100   | 0     | ≤0.25 | >0.5 | 100   | 0     |
|                                                               | <0.016-     |       |       |      |       |       |       |       |      |       |       |
| amoxicillin/clavulanate*                                      | 0.125       | 0.023 | 0.064 | ≤4/2 | ≥16/8 | 100   | 0     | ≤4    | >8   | -     | -     |
| clindamycin                                                   | 0.016->256  | 0.064 | 1.5   | ≤2   | ≥8    | 90.91 | 9.09  | ≤4    | >4   | 90.91 | 9.09  |
| metronidazole                                                 | 0.016->256  | 1     | >256  | ≤8   | ≥32   | 54.54 | 45.45 | ≤4    | >4   | 54.55 | 45.45 |
| meropenem                                                     | 0.003-0.047 | 0.016 | 0.047 | ≤4   | ≥16   | 100   | 0     | ≤2    | >8   | 100   | 0     |

<sup>1</sup>*Bacteroides fragilis* (n=83), *Bacteroides thetaiotaomicron* (n=16), *Bacteroides ovatus* (n=7), *Bacteroides vulgatus* (n=5), *Bacteroides caccae* (n=3), *Bacteroides uniformis* (n=3), *Bacteroides stercoris* (n=2), *Bacteroides cellulosilyticus*(n=1); <sup>2</sup>*Prevotella bivia* (n=24), *Prevotella disiens* (n=4), *Prevotella buccae* (n=1), *Prevotella nanceiensis* (n=1), *Prevotella timonensis* (n=1), <sup>3</sup>*Clostridium septicum* (n=4), *Clostridium sporogenes*

(n=3), *Clostridium tertium* (n=2), *Clostridium ramosum* (n=2), *Clostridium paraputrificum* (n=2), <sup>4</sup>*Bacteroides faecis*(n=3), *Bacteroides pyogenes* (n=6), *Odoribacter splanchnicus*(n=1), *Disulfovibrio desulfuricans*(n=1); <sup>5</sup>*Actinomyces europeus* (n=2), *Actinomyces turicensis* (n=1), *Bifidobacterium dentium* (n=1), *Eggerthia catenaformis* (n=1), *Murdochiella asaccharolytica* (n=1), *Parvimonas micra* (n=2), *Ruminococcus gnavus* (n=1), *Staphylococcus saccharolyticus* (n=1); \*Amoxicillin/clavulanate Etest strips in 2:1 ratio; \*\*Organisms classified as intermediate according to the CLSI method and EUCAST methods are not explicitly presented.
